# Supplementary material for: Anthocyanin Intake and Physical Activity: Associations with the Lipid Profile of a US Working Population
Source: MDPI journal article supplement (doi:10.3390/molecules25194398), 2020-09-24
Supplement: s1 [file s1]

**Table S1:** Independent associations of anthocyanin intake (SD) and physical activity level with lipid profile measures (mg/dL).

| <b>Lipid profile:</b>                                  | <b>Anthocyanin intake (SD)</b>    |                | <b>Physical activity level*</b>   |                |
|--------------------------------------------------------|-----------------------------------|----------------|-----------------------------------|----------------|
|                                                        | <b><math>\beta</math> (95%CI)</b> | <b>p-value</b> | <b><math>\beta</math> (95%CI)</b> | <b>p-value</b> |
| <b>Triglycerides</b>                                   |                                   |                |                                   |                |
| Age, sex, and energy adjusted model (95% CI)           | -9.13 (-17.76 to -0.50)           | 0.04           | -8.14 (-12.48 to -3.79)           | <0.001         |
| Multivariable adjusted model 1 (95% CI) <sup>a</sup>   | -7.69 (-16.16 to 0.79)            | 0.08           | -5.75 (-10.23 to -1.28)           | 0.01           |
| Multivariable adjusted model 2 (95% CI) <sup>b</sup>   | -9.06 (-18.10 to -0.03)           | 0.05           | -5.70 (-10.59 to -0.81)           | 0.02           |
| Multivariable adjusted model 3 (95% CI) <sup>c/d</sup> | -7.73 (-16.83 to 1.37)            | 0.10           | -5.54 (-10.40 to -0.67)           | 0.03           |
| <b>Total cholesterol</b>                               |                                   |                |                                   |                |
| Age, sex, and energy adjusted model (95% CI)           | -2.19 (-6.80 to 2.42)             | 0.35           | -2.69 (-5.03 to -0.34)            | 0.03           |
| Multivariable adjusted model 1 (95% CI) <sup>a</sup>   | -2.91 (-7.61 to 1.80)             | 0.23           | -3.15 (-5.63 to -0.67)            | 0.01           |
| Multivariable adjusted model 2 (95% CI) <sup>b</sup>   | -2.16 (-7.13 to 2.80)             | 0.39           | -2.06 (-4.75 to 0.62)             | 0.13           |
| Multivariable adjusted model 3 (95% CI) <sup>c/d</sup> | -1.36 (-6.38 to 3.67)             | 0.60           | -2.06 (-4.75 to 0.64)             | 0.13           |
| <b>HDL cholesterol</b>                                 |                                   |                |                                   |                |
| Age, sex, and energy adjusted model (95% CI)           | 1.43 (0.09 to 2.76)               | 0.04           | 0.99 (0.31 to 1.67)               | 0.01           |
| Multivariable adjusted model 1 (95% CI) <sup>a</sup>   | 1.23 (-0.05 to 2.52)              | 0.06           | 0.59 (-0.09 to 1.28)              | 0.09           |
| Multivariable adjusted model 2 (95% CI) <sup>b</sup>   | 1.15 (-0.22 to 2.52)              | 0.10           | 0.59 (-0.15 to 1.34)              | 0.12           |
| Multivariable adjusted model 3 (95% CI) <sup>c/d</sup> | 1.23 (-0.16 to 2.62)              | 0.08           | 0.56 (-0.18 to 1.30)              | 0.14           |
| <b>LDL cholesterol</b>                                 |                                   |                |                                   |                |
| Age, sex, and energy adjusted model (95% CI)           | -1.75 (-5.83 to 2.33)             | 0.40           | -2.34 (-4.42 to -0.27)            | 0.03           |
| Multivariable adjusted model 1 (95% CI) <sup>a</sup>   | -2.47 (-6.65 to 1.70)             | 0.24           | -2.94 (-5.13 to -0.75)            | 0.01           |
| Multivariable adjusted model 2 (95% CI) <sup>b</sup>   | -1.56 (-5.97 to 2.85)             | 0.49           | -1.99 (-4.38 to 0.39)             | 0.10           |
| Multivariable adjusted model 3 (95% CI) <sup>c/d</sup> | -1.05 (-5.53 to 3.43)             | 0.65           | -1.99 (-4.37 to 0.40)             | 0.10           |
| <b>LDL:HDL</b>                                         |                                   |                |                                   |                |
| Age, sex, and energy adjusted model (95% CI)           | -0.11 (-0.21 to -0.01)            | 0.04           | -0.11 (-0.16 to -0.06)            | <0.001         |
| Multivariable adjusted model 1 (95% CI) <sup>a</sup>   | -0.12 (-0.22 to -0.01)            | 0.03           | -0.10 (-0.16 to -0.05)            | <0.001         |
| Multivariable adjusted model 2 (95% CI) <sup>b</sup>   | -0.10 (-0.21 to 0.01)             | 0.07           | -0.09 (-0.15 to -0.03)            | 0.004          |
| Multivariable adjusted model 3 (95% CI) <sup>b/c</sup> | -0.09 (-0.20 to 0.02)             | 0.11           | -0.09 (-0.14 to -0.03)            | 0.005          |
| <b>TG:HDL</b>                                          |                                   |                |                                   |                |
| Age, sex, and energy adjusted model (95% CI)           | -0.29 (-0.55 to -0.02)            | 0.04           | -0.25 (-0.39 to -0.12)            | <0.001         |
| Multivariable adjusted model 1 (95% CI) <sup>a</sup>   | -0.24 (-0.50 to 0.02)             | 0.08           | -0.18 (-0.32 to -0.04)            | 0.01           |
| Multivariable adjusted model 2 (95% CI) <sup>b</sup>   | -0.29 (-0.57 to -0.01)            | 0.05           | -0.19 (-0.34 to -0.04)            | 0.02           |
| Multivariable adjusted model 3 (95% CI) <sup>c/d</sup> | -0.25 (-0.53 to 0.03)             | 0.08           | -0.18 (-0.33 to -0.03)            | 0.02           |
| <b>Total cholesterol:HDL</b>                           |                                   |                |                                   |                |
| Age, sex, and energy adjusted model (95% CI)           | -0.17 (-0.30 to -0.04)            | 0.01           | -0.15 (-0.21 to -0.08)            | <0.001         |
| Multivariable adjusted model 1 (95% CI) <sup>a</sup>   | -0.17 (-0.30 to -0.04)            | 0.01           | -0.12 (-0.19 to -0.06)            | <0.001         |
| Multivariable adjusted model 2 (95% CI) <sup>b</sup>   | -0.16 (-0.29 to -0.02)            | 0.02           | -0.11 (-0.18 to -0.03)            | 0.004          |
| Multivariable adjusted model 3 (95% CI) <sup>c/d</sup> | -0.14 (-0.27 to -0.01)            | 0.04           | -0.10 (-0.18 to -0.03)            | 0.005          |

\*Physical activity was assessed using a scale of 0-7 representing levels of physical activity ranging from none to running >10 miles/wk or spending >3 hrs/wk in comparable physical activity.

<sup>a</sup>Adjusted for age, sex, BMI, smoking status, education level, marital status, prevalent hypertension, dyslipidemia, and type 2 diabetes.

<sup>b</sup>Adjusted for age, sex, BMI, total energy intake, mMDS, smoking status, education level, marital status, multivitamin use, supplement use, sleep, prevalent hypertension, dyslipidemia, and type 2 diabetes.

<sup>c</sup>Adjusted for age, sex, BMI, total energy intake, mMDS, smoking status, education level, marital status, multivitamin use, supplement use, sleep, activity level, sitting, sedentary behavior, prevalent hypertension, dyslipidemia, and type 2 diabetes.

<sup>d</sup>Adjusted for age, sex, BMI, total energy intake, mMDS, smoking status, education level, marital status, multivitamin use, supplement use, sleep, anthocyanin intake, prevalent hypertension, dyslipidemia, and type 2 diabetes.

TG: triglycerides, HDL: high density lipoprotein cholesterol, LDL: low density lipoprotein cholesterol

Boldface indicates statistical significance (p<0.05)
