# Supplementary material for: Anthocyanin Intake and Physical Activity: Associations with the Lipid Profile of a US Working Population
Source: MDPI journal article supplement (doi:10.3390/molecules25194398), 2020-09-24
Supplement: s1 [file s1]

**Table S3.** Description of the mMDS score developed using Feeding America’s Bravest diet and lifestyle questionnaire.

The possible responses indicated in the top row are matched with their corresponding points in the row directly below.

Calculation of the modified Mediterranean diet score (mMDS):

$$\text{mMDS1} + (\text{mMDS2} + \text{mMDS3}) + \text{mMDS4} + \text{mMDS5} + \text{mMDS6} + \text{mMDS9} + \text{mMDS12} + \text{mMDS15} + \text{mMDS16} + (\text{mMDS7} + \text{mMDS10} + \text{mMDS13}) * (1 - \text{fh}) + (\text{mMDS8} + \text{mMDS11} + \text{mMDS14}) * \text{fh}$$

<sup>1</sup> Weighted by the proportion of meals at home relative to the total number of meals per week (breakfast + lunch + dinner)

<sup>2</sup> Weighted by the proportion of meals at the firehouse (or on work time) relative to the total number of meals per week (breakfast + lunch + dinner)

| mMDS items                                                          | Components                                                                            | Score range | Points for each answer |                          |           |                       |                           |           |         |       |         |  |
|---------------------------------------------------------------------|---------------------------------------------------------------------------------------|-------------|------------------------|--------------------------|-----------|-----------------------|---------------------------|-----------|---------|-------|---------|--|
| 1. Fast-food or Take-out food                                       | How many times per week do you eat the following?                                     | 0-4         | never                  | ≤ 1                      | 2-3       | 3-4                   | 5-6                       | every day | 8-10    | ≥ 11  | missing |  |
|                                                                     |                                                                                       |             | 4 pts                  | 3 pts                    | 2 pts     | 2 pts                 | 1 pts                     | 1 pts     | 0 pts   | 0 pts | 0 pts   |  |
| 2. Fruits                                                           | How many servings of each of the following do you consume per day?                    | 0-4         | 0                      | ≤ 1                      | 2-3       | 3-4                   | 5-6                       | ≥ 7       | missing |       |         |  |
|                                                                     |                                                                                       |             | 0 pts                  | 1 pts                    | 2 pts     | 3 pts                 | 4 pts                     | 4 pts     | 0 pts   |       |         |  |
| 3. Vegetables (not including potatoes)                              | How many servings of each of the following do you consume per day?                    | 0-4         | 0                      | ≤ 1                      | 2-3       | 3-4                   | 5-6                       | ≥ 7       | missing |       |         |  |
|                                                                     |                                                                                       |             | 0 pts                  | 1 pts                    | 2 pts     | 3 pts                 | 4 pts                     | 4 pts     | 0 pts   |       |         |  |
| 4. Legumes (e.g. beans, chickpeas, lentils)                         | How many servings of each of the following foods do you eat per week?                 | 0-4         | 0                      | ≤ 1                      | 2-3       | 3-4                   | 5-6                       | ≥ 7       | missing |       |         |  |
|                                                                     |                                                                                       |             | 0 pts                  | 0 pts                    | 1 pts     | 2 pts                 | 3 pts                     | 4 pts     | 0 pts   |       |         |  |
| 5. Nuts (e.g. walnuts, almonds, hazelnuts, pistachio, peanuts)      | How many servings of each of the following foods do you eat per week?                 | 0-4         | 0                      | ≤ 1                      | 2-3       | 3-4                   | 5-6                       | ≥ 7       | missing |       |         |  |
|                                                                     |                                                                                       |             | 0 pts                  | 0 pts                    | 1 pts     | 2 pts                 | 3 pts                     | 4 pts     | 0 pts   |       |         |  |
| 6. Sweet Desserts (cake, cookies, pie, ice cream, etc.)             | How many times per week do you eat the following?                                     | 0-4         | never                  | ≤ 1                      | 2-3       | 3-4                   | 5-6                       | ≥ 7       | missing |       |         |  |
|                                                                     |                                                                                       |             | 4 pts                  | 4 pts                    | 3 pts     | 2 pts                 | 1 pts                     | 0 pts     | 0 pts   |       |         |  |
| 7. Primary cooking oil/fat use at home <sup>1</sup>                 | Which oil or fat do you use most often for cooking and serving food at home?          | 0-5         | Butter                 | Lard or other animal fat | Margarine | Corn or vegetable oil | Benechol or Smart Balance | Olive oil | EVOO    | other | missing |  |
|                                                                     |                                                                                       |             | 0                      | 0 pts                    | 1 pts     | 2 pts                 | 3 pts                     | 4 pts     | 5 pts   | 0 pts | 0 pts   |  |
| 8. Primary cooking oil/fat use at work <sup>2</sup>                 | Which oil or fat do you use most often for cooking and serving food at the firehouse? | 0-5         | Butter                 | Lard or other animal fat | Margarine | Corn or vegetable oil | Benechol or Smart Balance | Olive oil | EVOO    | other | missing |  |
|                                                                     |                                                                                       |             | 0 pts                  | 0 pts                    | 1 pts     | 2 pts                 | 3 pts                     | 4 pts     | 5 pts   | 0 pts | 0 pts   |  |
| 9. Fried foods (French fries, fried chicken, chicken nuggets, etc.) | How many times per week do you eat the following?                                     | 0-4         | never                  | ≤ 1                      | 2-3       | 3-4                   | 5-6                       | every day | 8-10    | ≥ 11  | missing |  |
|                                                                     |                                                                                       |             | 4 pts                  | 3 pts                    | 2 pts     | 1 pts                 | 0 pts                     | 0 pts     | 0 pts   | 0 pts | 0       |  |

|                                                                                                     |                                                                                                |     |                              |                                                    |       |                                |       |                                                                   |       |                                                      |       |              |       |       |             |         |  |         |  |
|-----------------------------------------------------------------------------------------------------|------------------------------------------------------------------------------------------------|-----|------------------------------|----------------------------------------------------|-------|--------------------------------|-------|-------------------------------------------------------------------|-------|------------------------------------------------------|-------|--------------|-------|-------|-------------|---------|--|---------|--|
| 10. Breads/starches consumed at home <sup>1</sup>                                                   | Which bread or starch do you most frequently eat at home?                                      | 0-4 | I do not eat bread or starch | White bread, filled pasta, white rice, or potatoes |       | Durum wheat bread or dry pasta |       | French bread or Italian bread or multigrain or other crusty bread |       | Whole wheat bread or brown rice or whole wheat pasta |       | missing      |       |       |             |         |  |         |  |
|                                                                                                     |                                                                                                |     | 3 pts                        | 0 pts                                              |       | 3 pts                          |       | 2 pts                                                             |       | 4 pts                                                |       | 0 pts        |       |       |             |         |  |         |  |
| 11. Breads/starches consumed at work <sup>2</sup>                                                   | Which bread or starch do you most frequently eat at the firehouse?                             | 0-4 | I do not eat bread or starch | White bread, filled pasta, white rice, or potatoes |       | Durum wheat bread or dry pasta |       | French bread or Italian bread or multigrain or other crusty bread |       | Whole wheat bread or brown rice or whole wheat pasta |       | missing      |       |       |             |         |  |         |  |
|                                                                                                     |                                                                                                |     | 3 pts                        | 0 pts                                              |       | 3 pts                          |       | 2 pts                                                             |       | 4 pts                                                |       | 0 pts        |       |       |             |         |  |         |  |
| 12. Baked, broiled, grilled, or blackened (NOT fried) ocean fish (salmon, tuna, cod, haddock, etc.) | How many times per week do you eat the following?                                              | 0-4 | never                        | ≤ 1                                                |       | 2-3                            |       | 3-4                                                               |       | 5-6                                                  |       | every day    |       | 8-10  |             | ≥ 11    |  | missing |  |
|                                                                                                     |                                                                                                |     | 0 pts                        | 1 pts                                              |       | 2 pts                          |       | 3 pts                                                             |       | 4 pts                                                |       | 4 pts        |       | 4 pts |             | 4 pts   |  | 0 pts   |  |
| 13. Non-alcoholic beverages at home <sup>1</sup>                                                    | Which of the following non-alcoholic beverages do you most frequently drink at home?           | 0-4 | Cola/soda                    | Diet cola/soda                                     |       | Fruit drink or punch           |       | Milk                                                              |       | Tea/coffee                                           |       | Juice        |       | Water |             | Other   |  | missing |  |
|                                                                                                     |                                                                                                |     | 0 pts                        | 1 pts                                              |       | 1 pts                          |       | 1 pts                                                             |       | 2 pts                                                |       | 2 pts        |       | 4 pts |             | 0 pts   |  | 0 pts   |  |
| 14. Non-alcoholic beverages at work <sup>2</sup>                                                    | Which of the following non-alcoholic beverages do you most frequently drink at the firehouse?  | 0-4 | Cola/soda                    | Diet cola/soda                                     |       | Fruit drink or punch           |       | Milk                                                              |       | Tea/coffee                                           |       | Juice        |       | Water |             | Other   |  | missing |  |
|                                                                                                     |                                                                                                |     | 0 pts                        | 1 pts                                              |       | 1 pts                          |       | 1 pts                                                             |       | 2 pts                                                |       | 2 pts        |       | 4 pts |             | 0 pts   |  | 0 pts   |  |
| 15. Quantity of alcoholic beverages                                                                 | How many alcoholic beverages (beer, wine, hard liquor, etc.) do you drink over a typical week? | 0-4 | I do not drink               | 0                                                  | 1-2   | 3-4                            | 5-6   | 7-8                                                               | 9-10  | 11-12                                                | 13-14 | 15-16        | 17-18 | 19-20 | ≥ 21        | missing |  |         |  |
|                                                                                                     |                                                                                                |     | 0 pts                        | 0 pts                                              | 2 pts | 2 pts                          | 4 pts | 4 pts                                                             | 4 pts | 4 pts                                                | 4 pts | 4 pts        | 4 pts | 4 pts | 1 pts       | 0 pts   |  |         |  |
| 16. Wine consumption                                                                                | When you drink alcoholic beverages, what type do you drink?                                    | 0-2 | White wine                   |                                                    |       | Red wine                       |       |                                                                   | Beer  |                                                      |       | Hard liquors |       |       | Don't drink |         |  |         |  |
|                                                                                                     |                                                                                                |     | 2 pts                        |                                                    |       | 2 pts                          |       |                                                                   | 0 pts |                                                      |       | 0 pts        |       |       | 0 pts       |         |  |         |  |
