# Supplementary material for: Anthocyanin Intake and Physical Activity: Associations with the Lipid Profile of a US Working Population
Source: MDPI journal article supplement (doi:10.3390/molecules25194398), 2020-09-24
Supplement: s1 [file s1]

**Table S4:** Sensitivity analysis for anthocyanin intake (SD) and physical activity level on lipid profile measures (mg/dL).

| Sensitivity Analysis                                                 |     | Anthocyanin intake (SD) |         | Physical activity level* |         |
|----------------------------------------------------------------------|-----|-------------------------|---------|--------------------------|---------|
| Exclusions                                                           | n   | $\beta$ (95%CI)         | p-value | $\beta$ (95%CI)          | p-value |
| Chronic diseases <sup>†a</sup>                                       | 199 |                         |         |                          |         |
| Triglycerides                                                        |     | -9.09 (-19.24 to 1.06)  | 0.08    | -5.89 (-11.64 to -0.14)  | 0.05    |
| Total cholesterol                                                    |     | -2.29 (-7.67 to 3.12)   | 0.41    | -0.55 (-3.62 to 2.52)    | 0.72    |
| HDL cholesterol                                                      |     | 0.92 (-0.59 to 2.44)    | 0.23    | 0.85 (-0.01 to 1.70)     | 0.05    |
| LDL cholesterol                                                      |     | -1.44 (-6.14 to 3.27)   | 0.55    | -0.83 (-3.50 to 1.84)    | 0.54    |
| LDL:HDL                                                              |     | -0.09 (-0.21 to 0.03)   | 0.16    | -0.08 (-0.15 to -0.01)   | 0.03    |
| TG:HDL                                                               |     | -0.27 (-0.58 to 0.04)   | 0.09    | -0.21 (-0.39 to -0.04)   | 0.02    |
| Total cholesterol:HDL                                                |     | -0.14 (-0.29 to 0.01)   | 0.07    | -0.10 (-0.18 to -0.01)   | 0.03    |
| Women <sup>a</sup>                                                   | 236 |                         |         |                          |         |
| Triglycerides                                                        |     | -9.32 (-18.81 to 0.16)  | 0.05    | -5.69 (-10.76 to -0.63)  | 0.03    |
| Total cholesterol                                                    |     | -2.10 (-7.25 to 3.04)   | 0.42    | -1.97 (-4.72 to 0.77)    | 0.16    |
| HDL cholesterol                                                      |     | 0.72 (-0.67 to 2.12)    | 0.31    | 0.64 (-0.11 to 1.38)     | 0.09    |
| LDL cholesterol                                                      |     | -1.01 (-5.58 to 3.55)   | 0.66    | -1.97 (-4.40 to 0.46)    | 0.11    |
| LDL:HDL                                                              |     | -0.08 (-0.20 to 0.03)   | 0.16    | -0.09 (-0.15 to -0.03)   | 0.004   |
| TG:HDL                                                               |     | -0.29 (-0.58 to 0.01)   | 0.06    | -0.19 (-0.35 to -0.03)   | 0.02    |
| Total cholesterol:HDL                                                |     | -0.14 (-0.28 to 0.00)   | 0.05    | -0.11 (-0.18 to -0.03)   | 0.004   |
| Supplement use (proteins, glutamine, amino acids, etc.) <sup>a</sup> | 170 |                         |         |                          |         |
| Triglycerides                                                        |     | -8.72 (-19.39 to 1.96)  | 0.11    | -4.79 (-10.38 to 0.80)   | 0.09    |
| Total cholesterol                                                    |     | -4.22 (-10.53 to 2.08)  | 0.19    | -3.56 (-6.84 to -0.29)   | 0.03    |
| HDL cholesterol                                                      |     | 0.38 (-1.36 to 2.11)    | 0.69    | 0.23 (-0.68 to 1.14)     | 0.61    |
| LDL cholesterol                                                      |     | -2.77 (-8.44 to 2.91)   | 0.34    | -2.83 (-5.78 to 0.12)    | 0.06    |
| LDL:HDL                                                              |     | -0.09 (-0.22 to 0.05)   | 0.21    | -0.07 (-0.14 to -0.00)   | 0.04    |
| TG:HDL                                                               |     | -0.21 (-0.51 to 0.10)   | 0.18    | -0.10 (-0.26 to 0.06)    | 0.21    |
| Total cholesterol:HDL                                                |     | -0.13 (-0.29 to 0.03)   | 0.12    | -0.09 (-0.18 to -0.01)   | 0.03    |

\*Physical activity was assessed using a scale of 0-7 representing levels of physical activity ranging from none to running >10 miles/wk or spending >3 hrs/wk in comparable physical activity.

<sup>†</sup>Chronic diseases was defined as reporting a previous diagnosis or current treatment for hypertension, dyslipidemia, or diabetes, respectively.

<sup>a</sup>Adjusted for age, sex, BMI, total energy intake, mMDS, smoking status, education level, marital status, multivitamin use, supplement use, sleep, anthocyanin intake, prevalent hypertension, dyslipidemia, and type 2 diabetes

TG: triglycerides, HDL: high density lipoprotein cholesterol, LDL: low density lipoprotein cholesterol

Boldface indicates statistical significance (p<0.05)
